# Supplementary material for: Copolymeric Micelles Overcome the Oral Delivery Challenges of Amphotericin B
Source: PubMed Central journal article supplement (PMC7344903; doi:10.3390/ph13060121), 2020-06-11
Supplement: pharmaceuticals-13-00121-s001.pdf [file pharmaceuticals-13-00121-s001.pdf]

**Table 1.** Mean particle size, charge, PDI and %drug remaining of AmB-PM after 1 month at 4 °C in the absence of the day light. (Data were presented as mean  $\pm$  SD;  $n=3$ ).

|                                            | <b>AmB-PM (1:4)</b>         |                        | <b>AmB-PM (1:8)</b>         |                        |
|--------------------------------------------|-----------------------------|------------------------|-----------------------------|------------------------|
|                                            | <b>Initial preparations</b> | <b>1 month at 4 °C</b> | <b>Initial preparations</b> | <b>1 month at 4 °C</b> |
| <b>Size (nm) <math>\pm</math> SD</b>       | 85.4 $\pm$ 4.8              | 79.4 $\pm$ 3.5         | 84.0 $\pm$ 6.1              | 89.0 $\pm$ 2.1         |
| <b>Charge (mV) <math>\pm</math> SD</b>     | 7.27 $\pm$ 0.71             | 6.64 $\pm$ 0.22        | 6.77 $\pm$ 0.82             | 5.80 $\pm$ 0.44        |
| <b>PDI <math>\pm</math> SD</b>             | 0.10 $\pm$ 0.02             | 0.08 $\pm$ 0.02        | 0.072 $\pm$ 0.01            | 0.10 $\pm$ 0.01        |
| <b>%Drug remaining <math>\pm</math> SD</b> | 100                         | 93.78 $\pm$ 4.79       | 100                         | 93.02 $\pm$ 6.09       |
